# Supplementary material
Source: publisher figshare collection journal article supplement (https://acs.figshare.com/ndownloader/files/27393886)
Supplement: Supplementary file 1 [file 27393886]

## Supporting Information

### Fe Doping in $\text{LiMn}_{1.5}\text{Ni}_{0.5}\text{O}_4$ by Atomic Layer Deposition Followed by Annealing: Depths and Occupation Sites

*Yan Gao <sup>a</sup>, Han Yu <sup>a</sup>, Prashanth Sandineni <sup>b</sup>, Xiaoqing He <sup>c, d</sup>, Amitava Choudhury <sup>b</sup>, Jonghyun Park <sup>e</sup>, and Xinhua Liang <sup>a, \*</sup>*

<sup>a</sup> Department of Chemical and Biochemical Engineering, Missouri University of Science and Technology, Rolla, Missouri 65409, United States

<sup>b</sup> Department of Chemistry, Missouri University of Science and Technology, Rolla, Missouri 65409, United States

<sup>c</sup> Electron Microscopy Core Facility, University of Missouri, Columbia, Missouri 65211, United States

<sup>d</sup> Department of Mechanical and Aerospace Engineering, University of Missouri, Columbia, Missouri 65211, United States

<sup>e</sup> Department of Mechanical and Aerospace Engineering, Missouri University of Science and Technology, Rolla, Missouri 65409, United States

**\* Corresponding author. Email: [liangxin@mst.edu](mailto:liangxin@mst.edu)**

This supporting information file includes (1) X-ray diffraction (XRD) patterns of uncoated  $\text{LiMn}_{1.5}\text{Ni}_{0.5}\text{O}_4$  (LMNO), and LMNO after  $\text{FeO}_x$  atomic layer deposition (ALD) and post-annealed particles at 500 °C (Fe500), 600 °C (Fe600), 700 °C (Fe700), and 800 °C (Fe800), respectively; (2) cross-sectional scanning electron microscopy (SEM) image of one Fe700 particle; (3) X-ray photoelectron spectroscopy (XPS) survey scans of  $\text{Li}_4\text{Ti}_5\text{O}_{12}$  (LTO) and LMNO of UC, Fe650, and Fe700 after 200 cycles of charge/discharge in LMNO-LTO full cells; (4) XPS spectra of C 1s core levels of LMNO and LTO of UC, Fe650, and Fe700 in LMNO-LTO full cells after 200 cycles of charge/discharge; and (5) the fitted  $^{57}\text{Fe}$  Mössbauer spectroscopic values for Isomer Shift (IS), Quadrupole Splitting (QS), and Hyperfine magnetic splitting (H) of Fe650 and Fe700 samples.

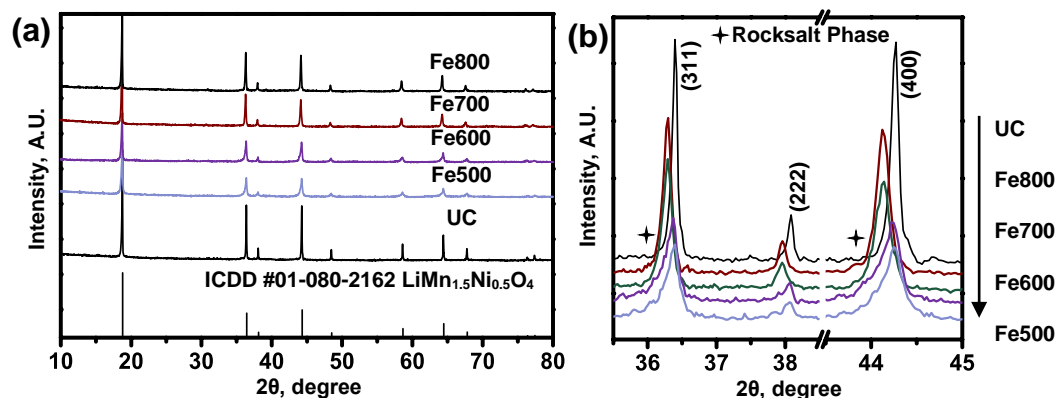

**Figure S1.** (a) XRD patterns of uncoated LMNO (UC), Fe500, Fe600, Fe700, and Fe800 particles and (b) the magnified patterns between 35.5 degree and 45 degree of  $2\theta$ .

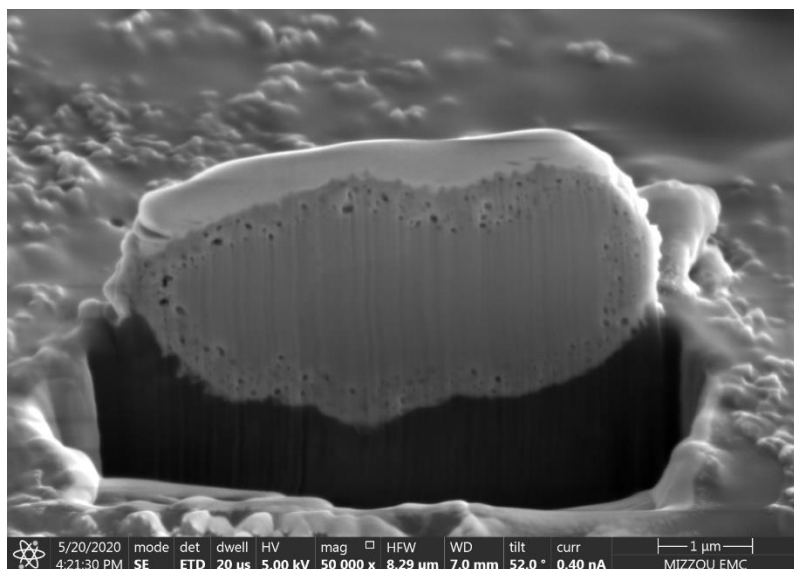

**Figure S2.** Cross-sectional SEM image of one Fe700 particle.

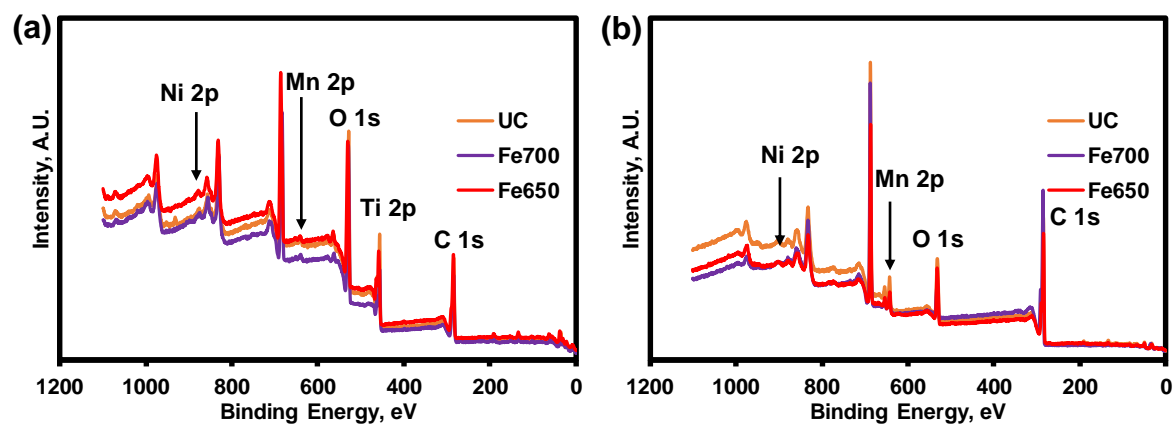

**Figure S3.** XPS survey scans of (a) LTO and (b) LMNO of UC, Fe650, and Fe700 after 200 cycles of charge/discharge in LMNO-LTO full cells.

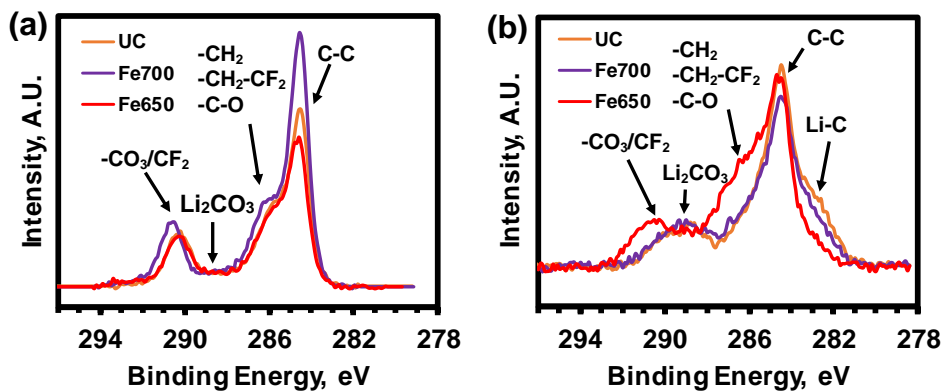

**Figure S4.** XPS spectra of C 1s core levels of (a) LMNO and (b) LTO of UC, Fe650, and Fe700 after 200 cycles of charge/discharge in LMNO-LTO full cells.

**Table S1.** The fitted  $^{57}\text{Fe}$  Mössbauer spectroscopic values for Isomer Shift (IS), Quadrupole Splitting (QS), and Hyperfine magnetic splitting (H) of Fe650 and Fe700 samples.

**Fe 650**

| Sites          | IS ( $\delta$ )<br>(mm.s $^{-1}$ ) | QS ( $\Delta E_Q$ )<br>(mm.s $^{-1}$ ) | Width<br>(mm.s $^{-1}$ ) | Hyperfine magnetic<br>field, H (k Oe) | Site population (%) |
|----------------|------------------------------------|----------------------------------------|--------------------------|---------------------------------------|---------------------|
| Doublet site-1 | 0.333(2)                           | 0.779(3)                               | 0.29(3)                  |                                       | 37.1                |
| Doublet site-2 | 0.216(5)                           | 0.440(1)                               | 0.38(9)                  |                                       | 18.1                |
| Sextet site    | 0.274(3)                           |                                        | 0.35(8) (W3)             | 454.3(3)                              | 44.8                |

**Fe 700**

| Sites          | IS( $\delta$ ) (mm.s $^{-1}$ ) | QS ( $\Delta E_Q$ ) (mm.s $^{-1}$ ) | Width (mm.s $^{-1}$ ) | Site population (%) |
|----------------|--------------------------------|-------------------------------------|-----------------------|---------------------|
| Doublet site-1 | 0.322(8)                       | 0.792(2)                            | 0.28(1)               | 65.2                |
| Doublet site-2 | 0.244(2)                       | 0.375(3)                            | 0.27(3)               | 34.8                |
